# Supplementary material for: An engineered monomer binding-protein for α-synuclein efficiently inhibits the proliferation of amyloid fibrils
Source: eLife. 2019 Aug 21;8:e46112. doi: 10.7554/eLife.46112 (PMC6721797; doi:10.7554/eLife.46112)
Supplement: Figure 2—source data 1. — The data can be found under the following link: https://osf.io/qs2yf/. [file elife-46112-fig2-data1.xls]

## Sheet: Tabelle1
BiFC (bimolecular fluorescence complementation)
Numbers are percentage of YFP (venus) positive cells in the noted groups in three independent experiments
	number of BiFC positive cells				number of BiFC negative cells				total number of cells				percentage of BiFC positive cells
independent experiment	1	2	3		1	2	3		1	2	3		1	2	3
a-syn wt VNVC/ control	1590	3615	862.5		73410	71385	74137.5		75000	75000	75000		2.12	4.82	1.15
a-syn wt VNVC/ AS69	712.5	2092.5	382.5		74287.5	72907.5	74617.5		75000	75000	75000		0.95	2.79	0.51
a-syn A53T VNVC/ control	2820	4642.5	1230		72180	70357.5	73770		75000	75000	75000		3.76	6.19	1.64
a-syn A53T VNVC/ AS69	802.5	3480	337.5		74197.5	71520	74662.5		75000	75000	75000		1.07	4.64	0.45
