# Supplementary figures and images for: An engineered monomer binding-protein for α-synuclein efficiently inhibits the proliferation of amyloid fibrils
Source: eLife journal article supplement (doi:10.7554/elife.46112), 2019-08-07

a

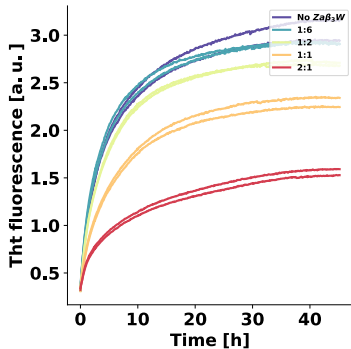

b

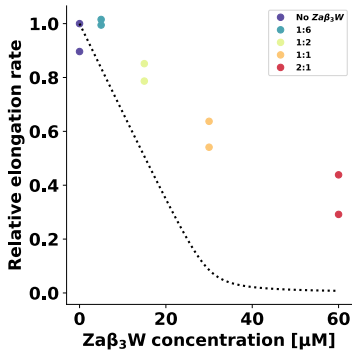

Supplement: supp [file elife_poa_e46112_Figure_4_figure_supplement_1.pdf › elife_poa_e46112_Figure_4_figure_supplement_1.pdf]

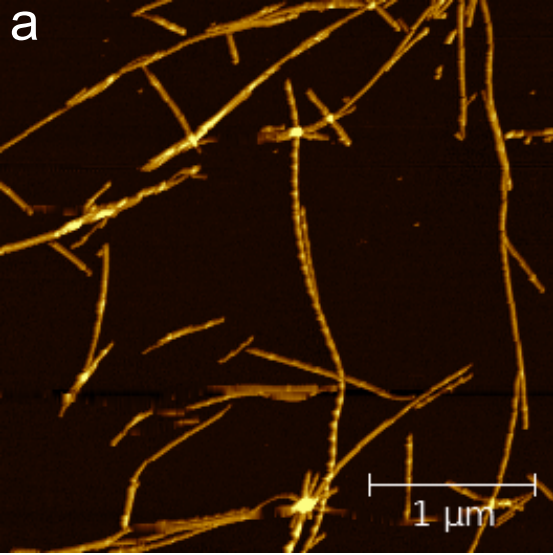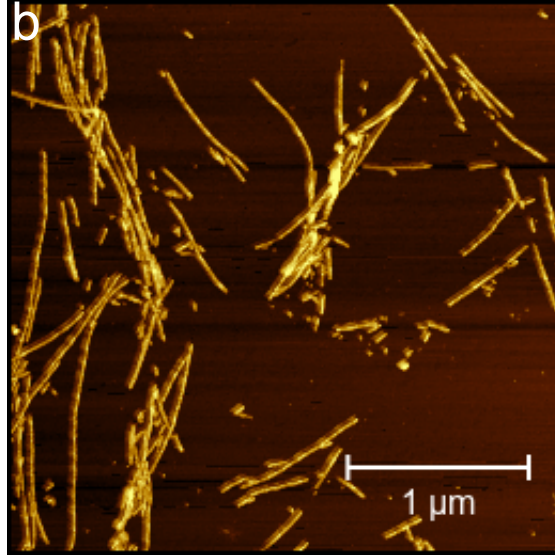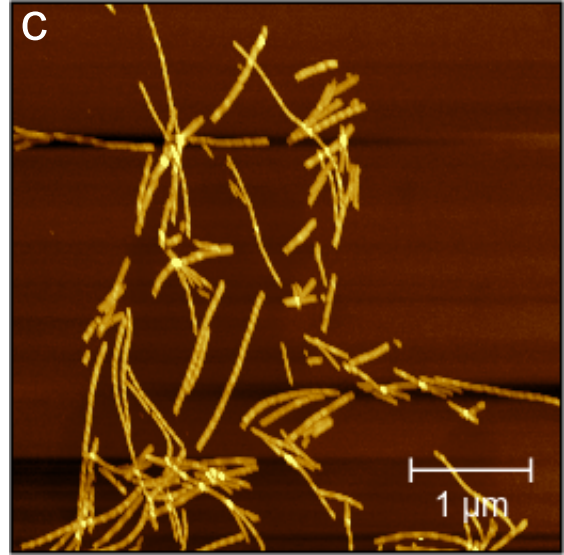

Supplement: supp [file elife_poa_e46112_Figure_4_figure_supplement_2.pdf › elife_poa_e46112_Figure_4_figure_supplement_2.pdf]

a

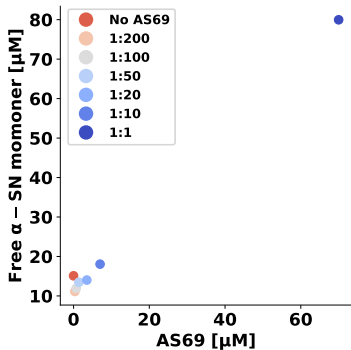

b

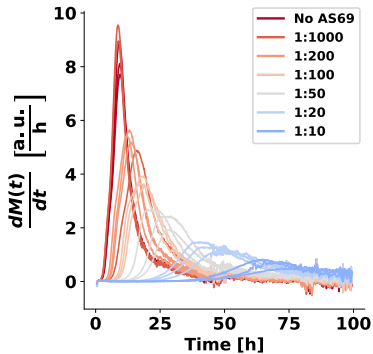

Supplement: supp [file elife_poa_e46112_Figure_6_figure_supplement_1.pdf › elife_poa_e46112_Figure_6_figure_supplement_1.pdf]

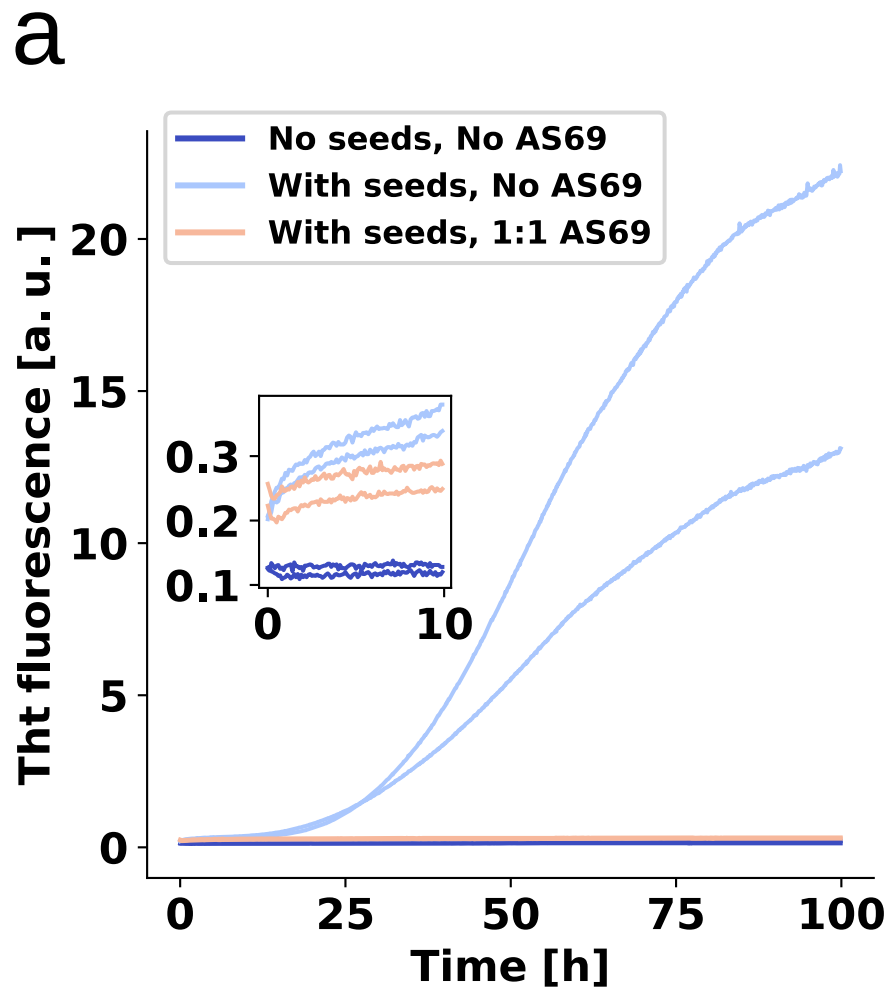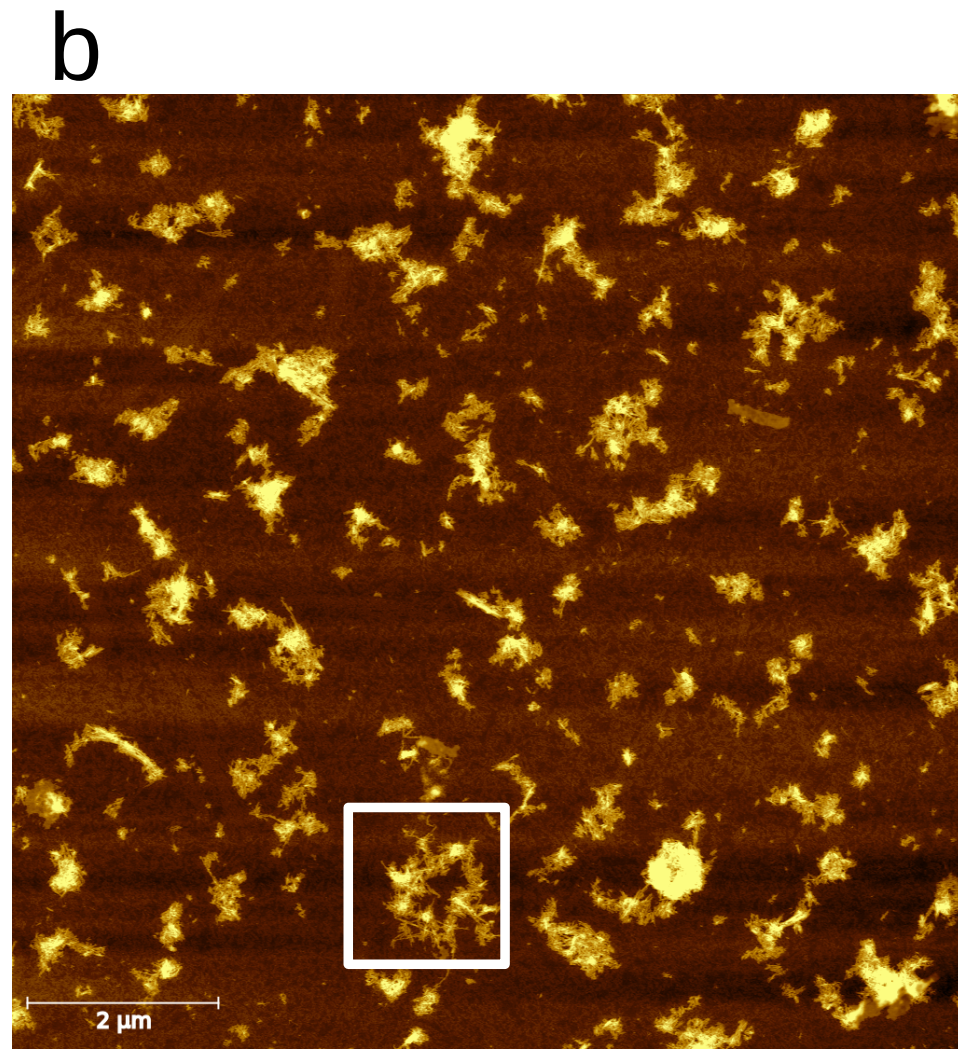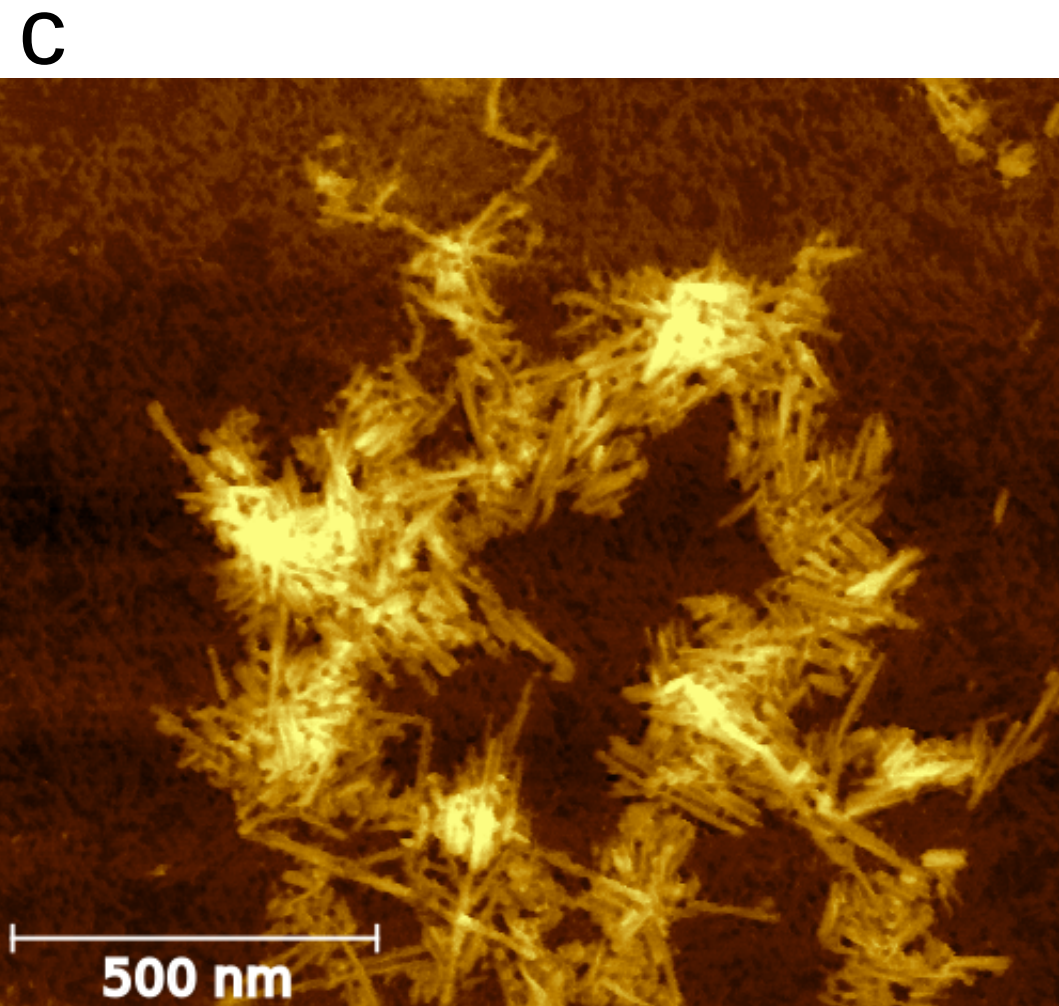

Supplement: supp [file elife_poa_e46112_Figure_6_figure_supplement_2.pdf › elife_poa_e46112_Figure_6_figure_supplement_2.pdf]

**a**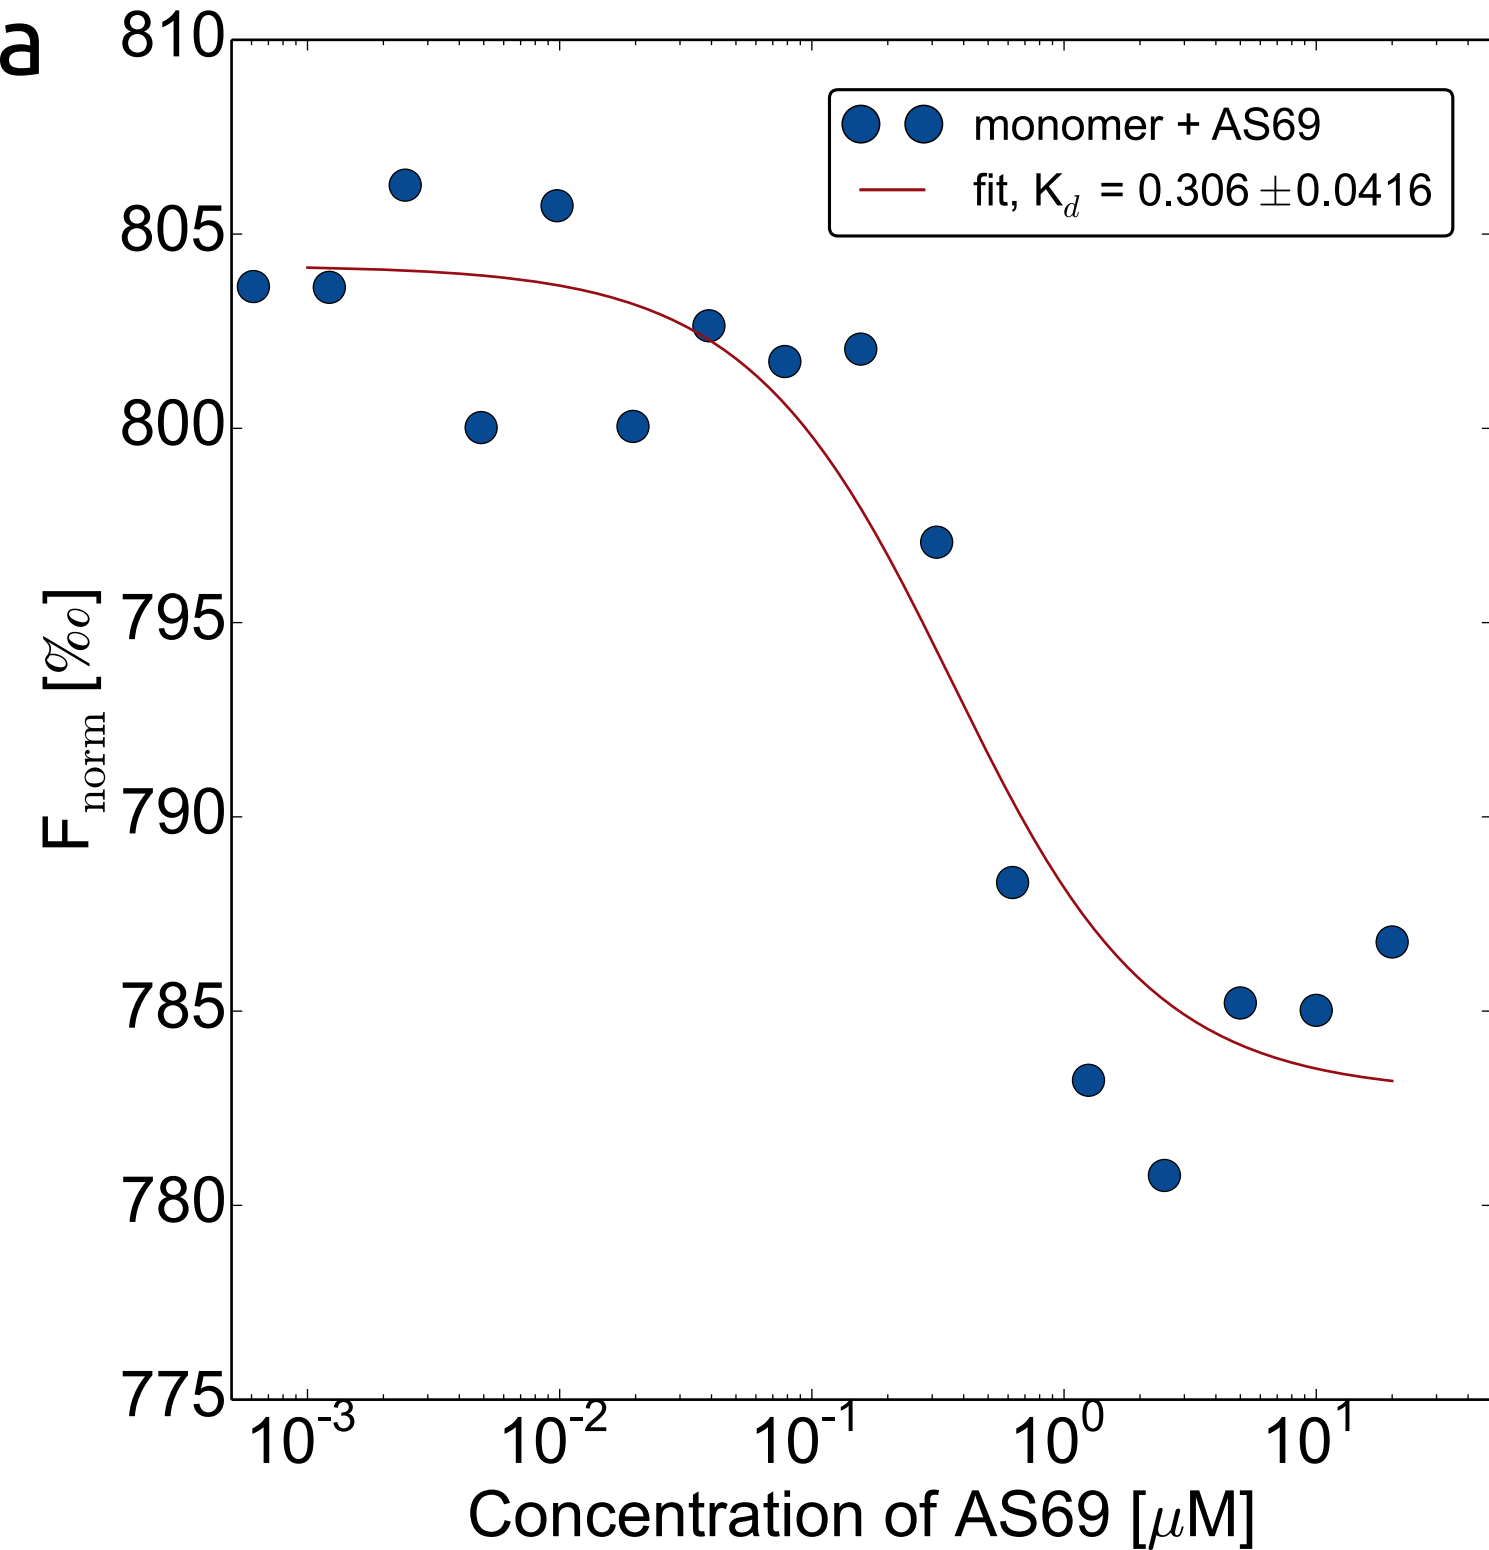**b**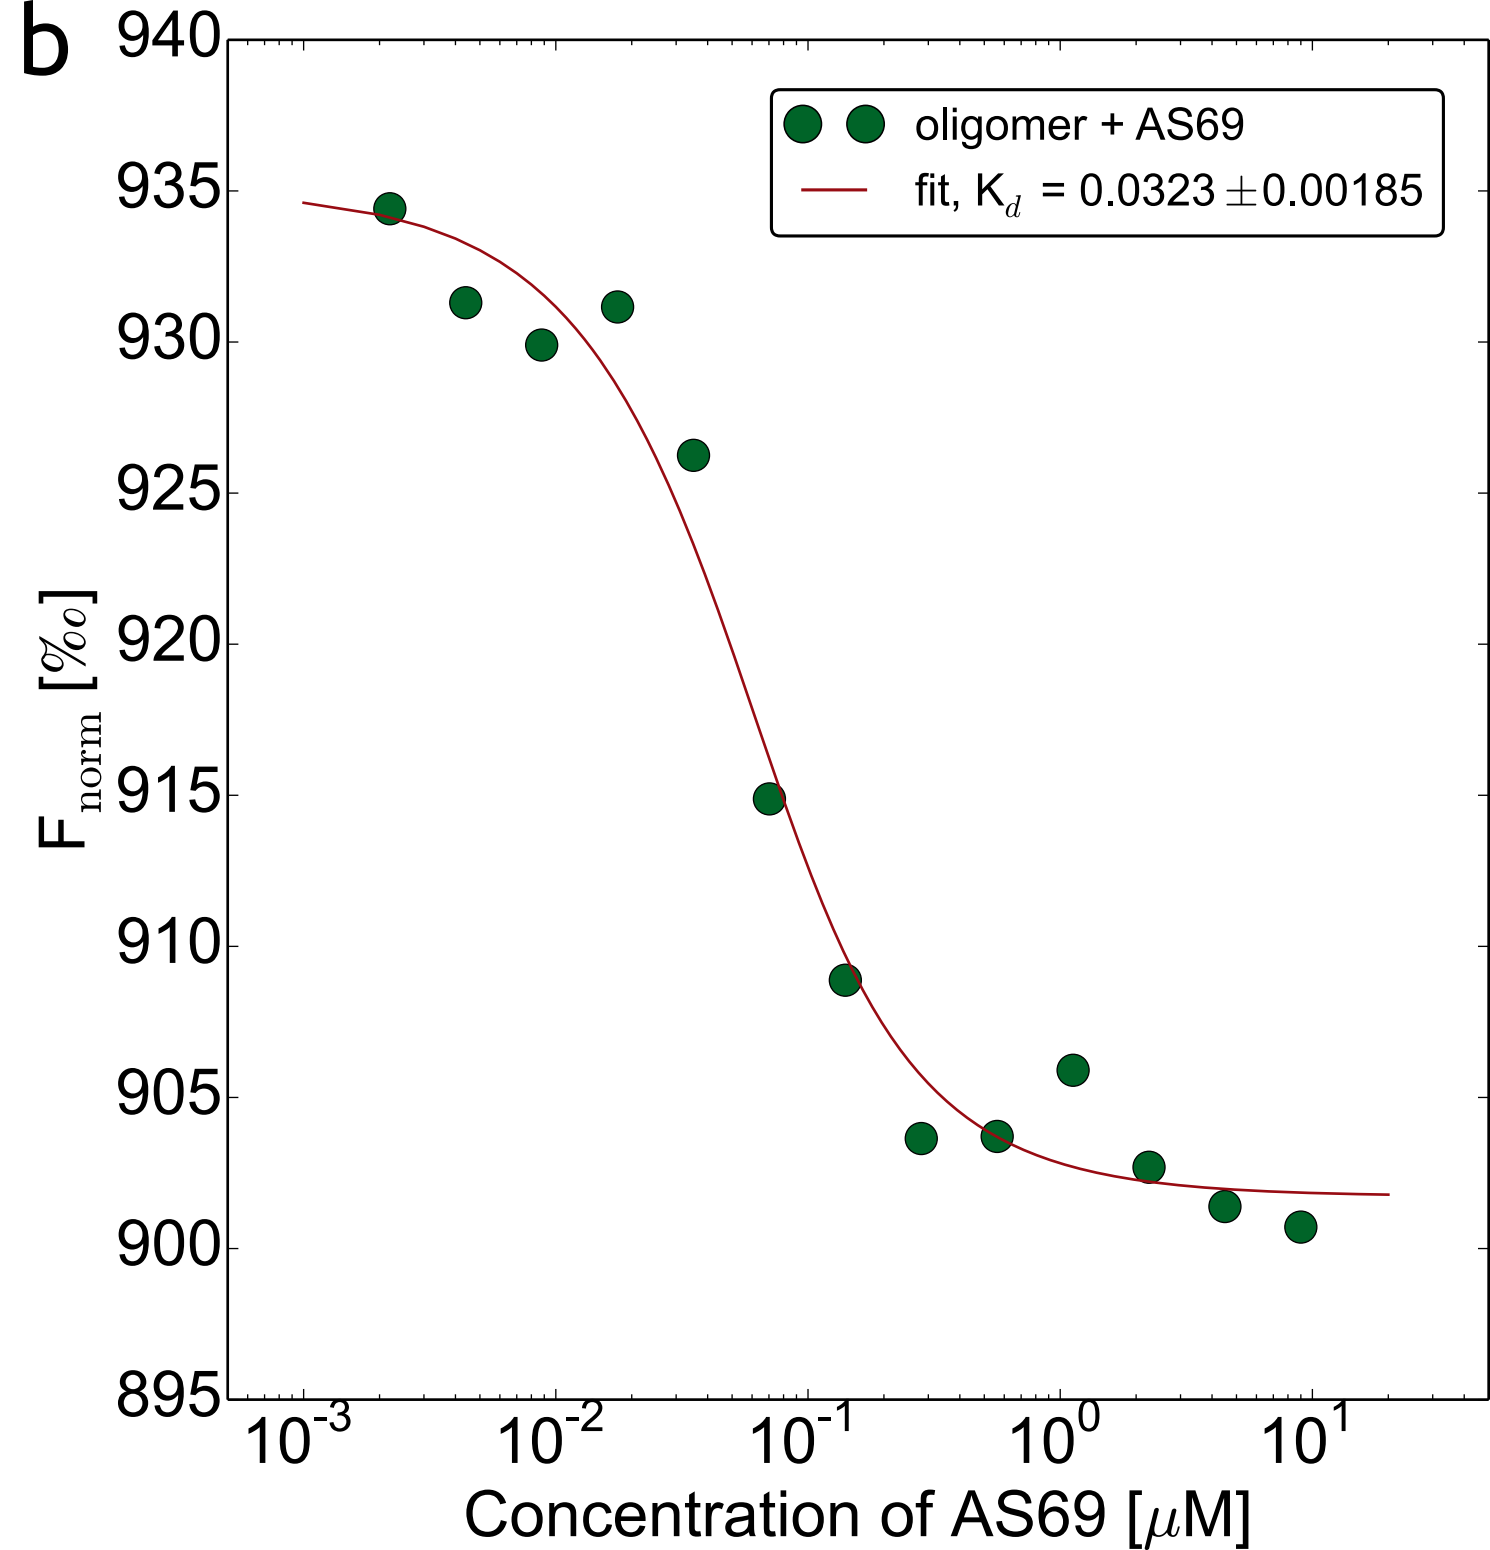

Supplement: supp [file elife_poa_e46112_Figure_6_figure_supplement_3.pdf › elife_poa_e46112_Figure_6_figure_supplement_3.pdf]

a

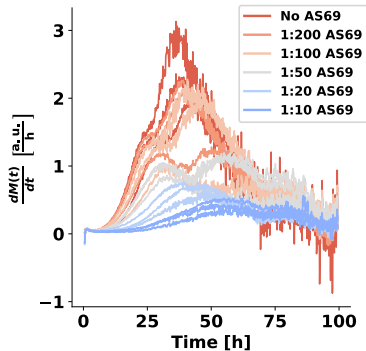

b

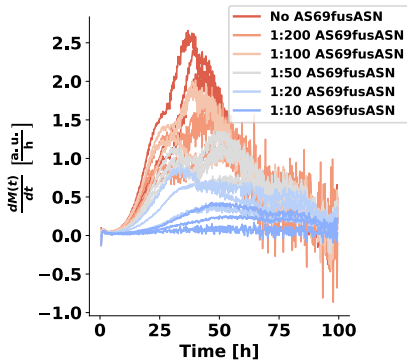

Supplement: supp [file elife_poa_e46112_Figure_8_figure_supplement_1.pdf › elife_poa_e46112_Figure_8_figure_supplement_1.pdf]

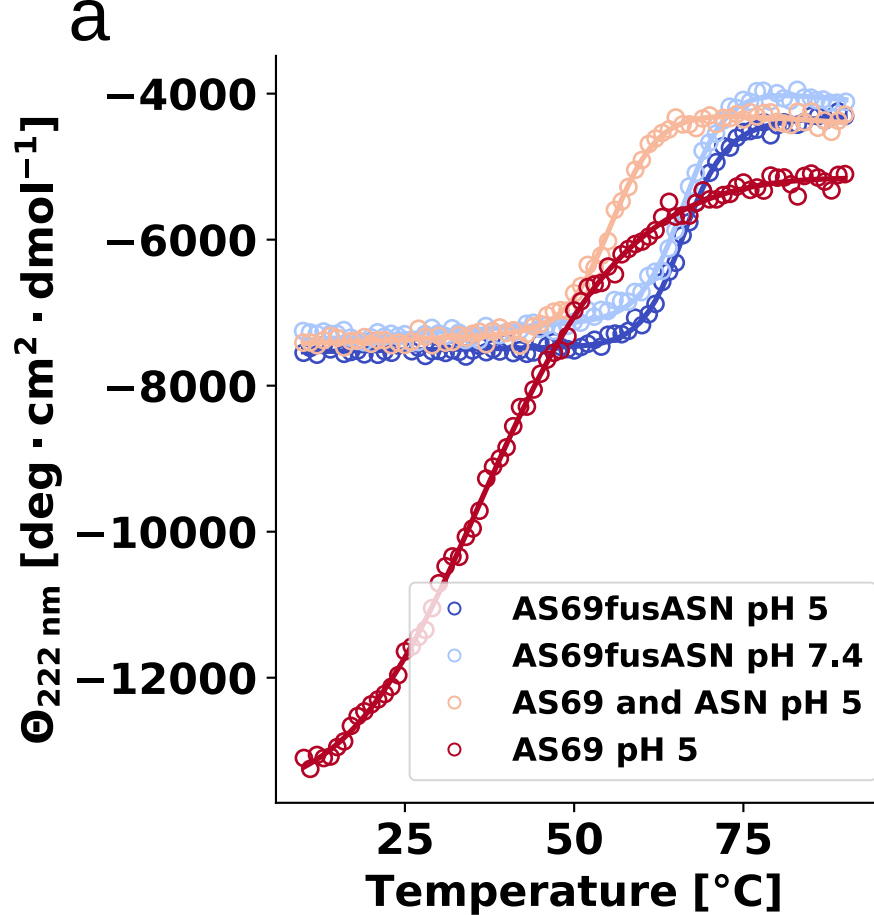

**b**

| Construct            | $T_M$ [°C]<br>pH 7.4 | $T_M$ [°C]<br>pH 5 |
|----------------------|----------------------|--------------------|
| AS69                 | 37.5(±1.6)*          | 36.5(±1.8)         |
| AS69 + $\alpha$ -syn | 51.0(±0.6)*          | 55.8(±0.2)         |
| AS69fusASN           | 66.5(±0.3)           | 66.1(±0.2)         |

Supplement: supp [file elife_poa_e46112_Figure_8_figure_supplement_2.pdf › elife_poa_e46112_Figure_8_figure_supplement_2.pdf]

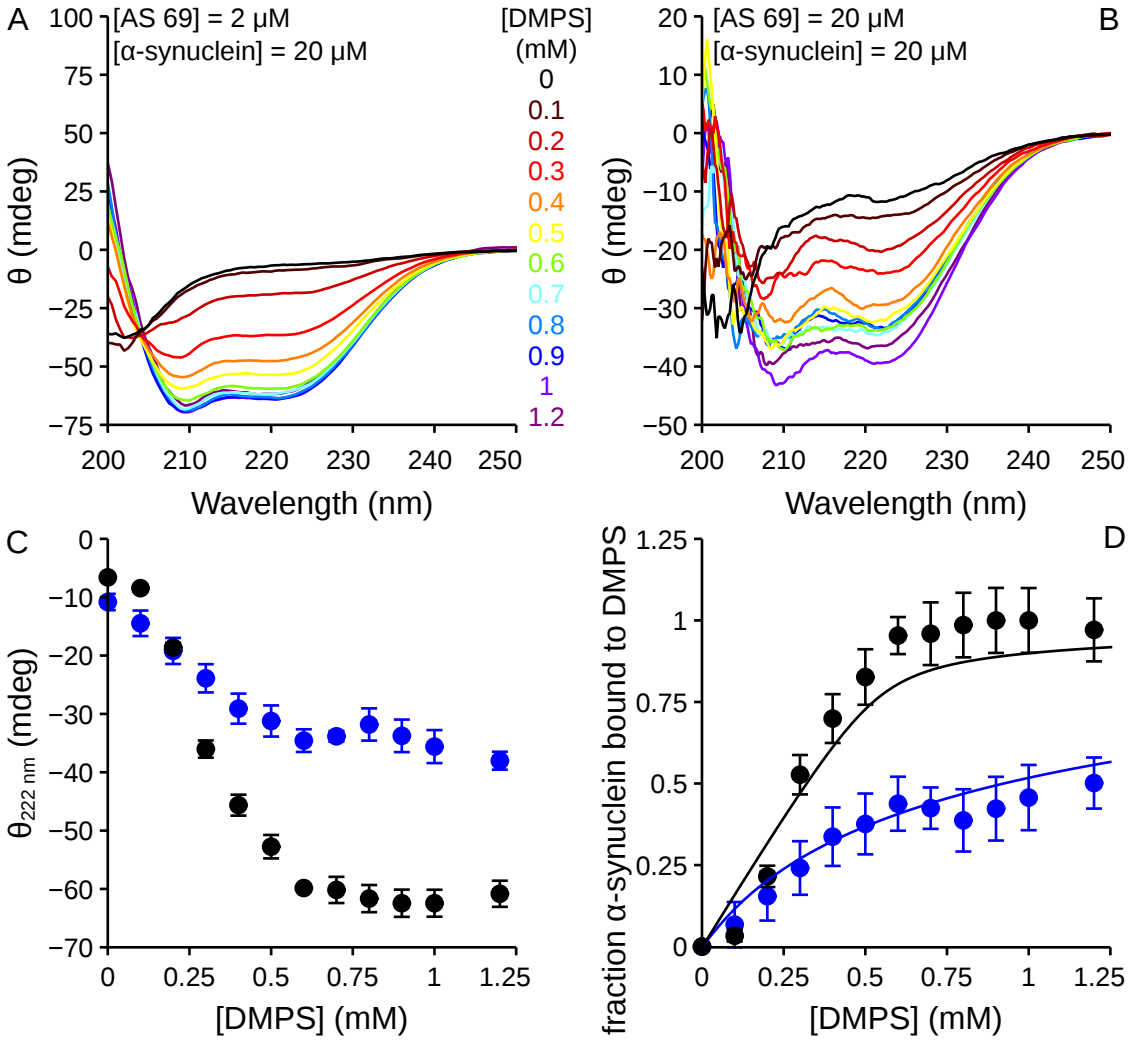

Supplement: supp [file elife_poa_e46112_Figure_9_figure_supplement_1.pdf › elife_poa_e46112_Figure_9_figure_supplement_1.pdf]

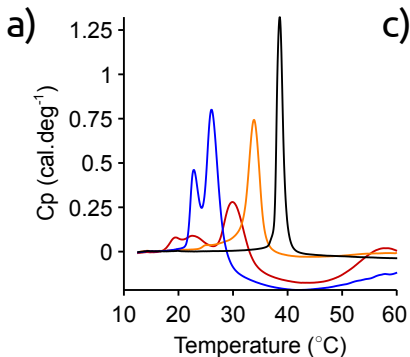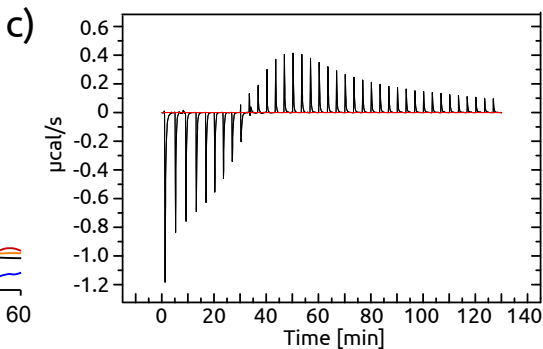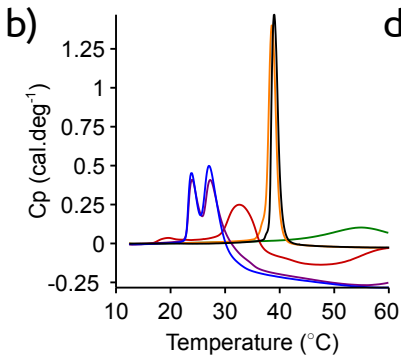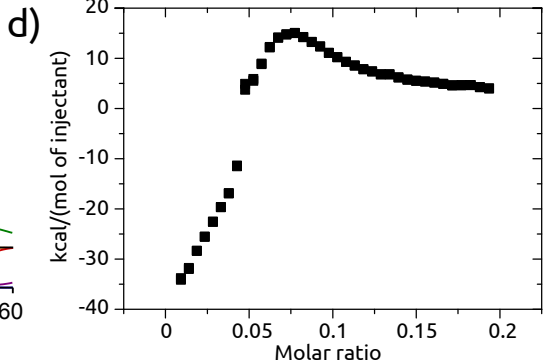

Supplement: supp [file elife_poa_e46112_Figure_9_figure_supplement_2.pdf › elife_poa_e46112_Figure_9_figure_supplement_2.pdf]
